# Supplementary material for: Two-dimensional β-PdX2 (X = S, Te) monolayers for efficient solar energy conversion applications
Source: Royal Society of Chemistry journal article supplement (doi:10.1039/d1ta10925a), 2022-01-01
Supplement: d1ta10925a1.pdf [file d1ta10925a1.pdf]

..

## **Two-Dimensional $\beta$ -PdX<sub>2</sub> (X = S, Te) Monolayers for Efficient Solar Energy Conversion Applications**

Mukesh Jakhar and Ashok Kumar\*

*Department of Physics, School of Basic Sciences, Central University of Punjab, Bathinda,  
151401, India*

(February 24, 2022)

\*Corresponding Author:

[ashokphy@cup.edu.in](mailto:ashokphy@cup.edu.in) (Ashok Kumar)

## Structure and Stability

**Table S1.** Structural properties of  $\beta$ -PdX<sub>2</sub> bulk and monolayer.

| Structures                 | Lattice Constants (Bulk) |       |       | Lattice Constants (Monolayer) |       | Pd-X, X-X (X=S,Te) (Bulk) | Pd-X, X-X (X=S,Te) (Monolayer) |
|----------------------------|--------------------------|-------|-------|-------------------------------|-------|---------------------------|--------------------------------|
|                            | a (Å)                    | b (Å) | c (Å) | a (Å)                         | b (Å) |                           |                                |
| $\beta$ -PdS <sub>2</sub>  | 3.49                     | 4.32  | 5.0   | 3.48                          | 4.31  | 2.35, 2.11                | 2.35, 2.11                     |
| $\beta$ -PdTe <sub>2</sub> | 3.96                     | 4.93  | 5.42  | 3.95                          | 4.86  | 2.64, 2.86                | 2.64, 2.80                     |

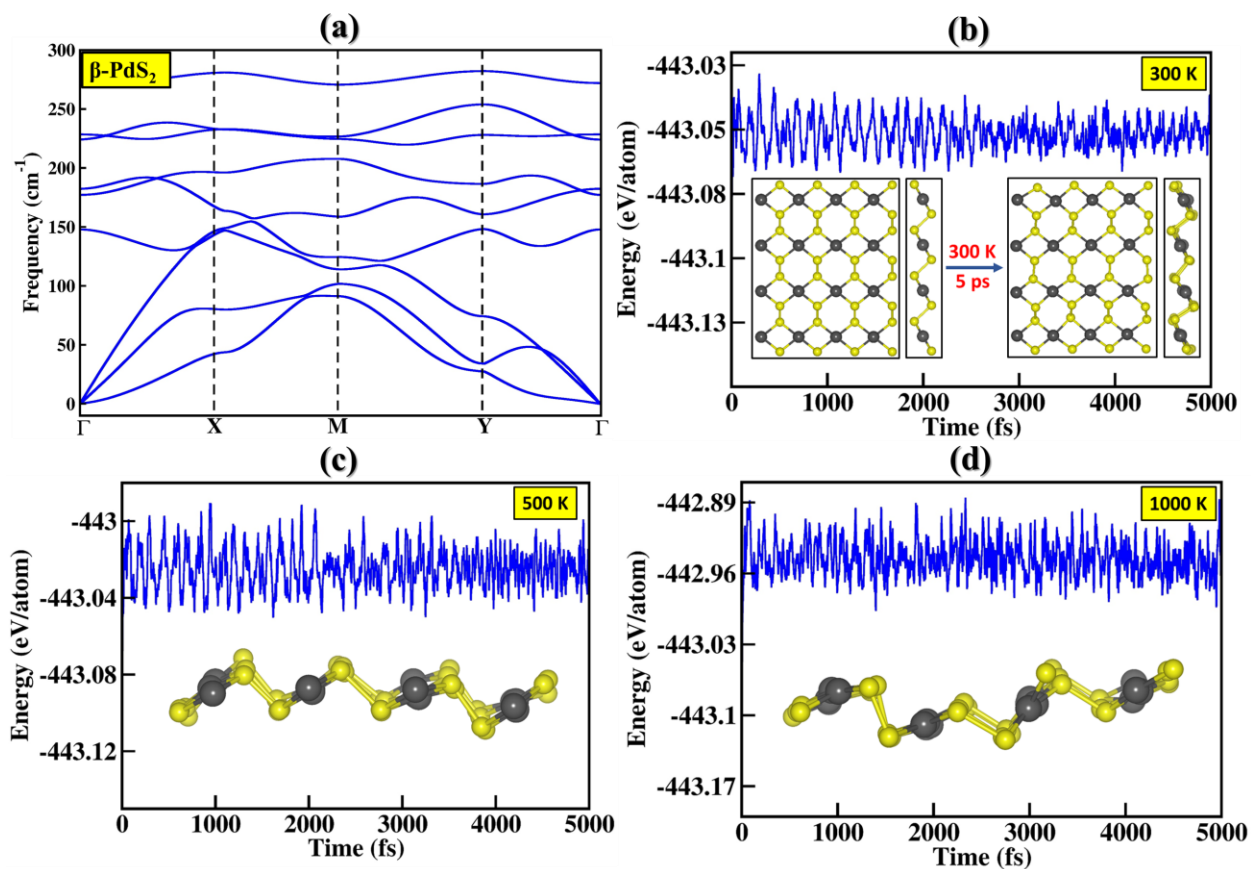

**Fig. S1** (a) The calculated phonon dispersion spectra of  $\beta$ -PdS<sub>2</sub> monolayer. The AIMD total energy fluctuations at (b) 300 K, (c) 500 K, and (d) 1000 K with the snapshot of  $\beta$ -PdS<sub>2</sub> monolayer before and after a 5000 fs AIMD simulations.

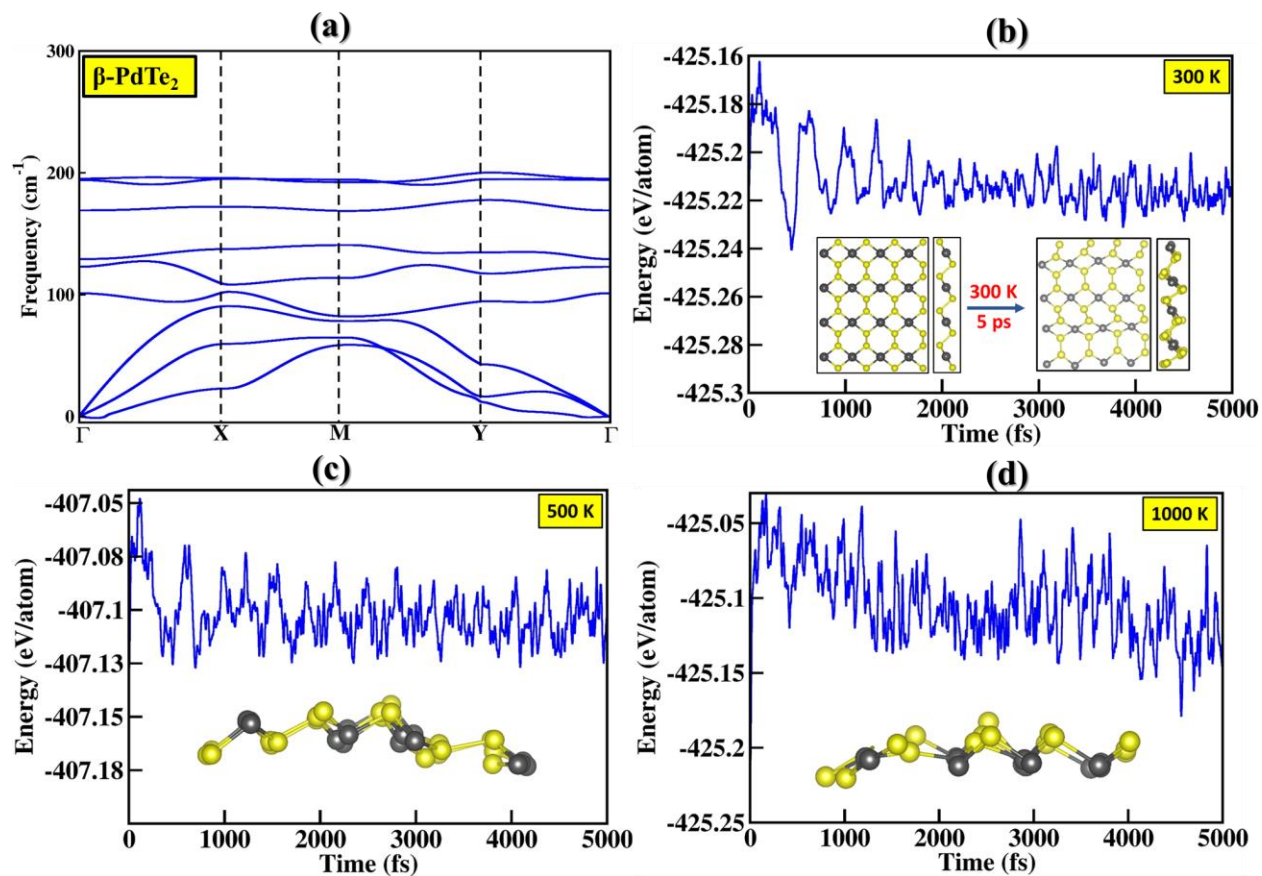

**Fig. S2** (a) The calculated phonon dispersion spectra of  $\beta$ -PdTe<sub>2</sub> monolayer. The AIMD kinetic and total energy fluctuations at (b) 300 K, (c) 500 K, and (d) 1000 K with the snapshot of  $\beta$ -PdTe<sub>2</sub> monolayer before and after a 5000 fs AIMD simulations.

### Electronic Structure with SOC

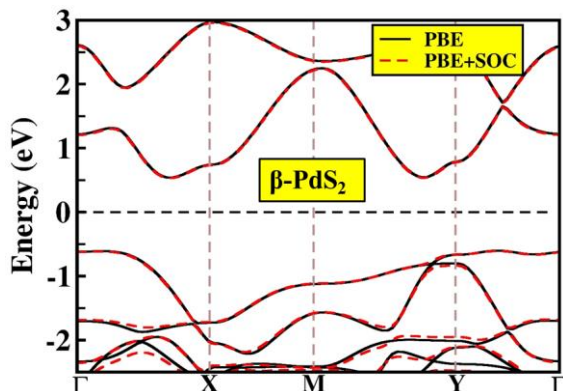

**Fig. S3** The calculated band structure for  $\beta$ -PdS<sub>2</sub> monolayer with spin-orbital coupling (SOC) (red) and without SOC (black) extracted from PBE functional.

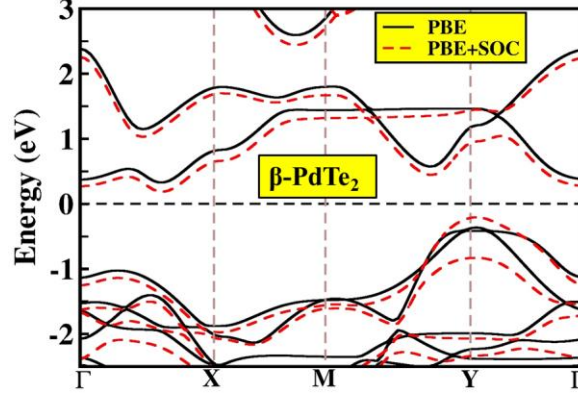

**Fig. S4** The calculated band structure for  $\beta$ -PdTe<sub>2</sub> monolayer with spin-orbital coupling (SOC) (red) and without SOC (black) extracted from PBE functional.

### Carrier Mobilities

The charge carrier mobilities have been calculated using  $\mu_{2D} = \frac{e\hbar^3 C_{2D}}{K_B T m^* m_a^* E_i^2}$  where,  $C_{2D}$  is the elastic modulus of the material along transport direction and is given by  $C_{2D} = \frac{1}{S_0} \left( \frac{\delta^2 E_{total}}{\delta \epsilon^2} \right)$ .  $E_{total}$ ,  $\epsilon$ , and  $S_0$  are the total energy, uniaxial strain, and the unstrained unit cell area, respectively.  $E_i$  is the deformation potential which is defined as  $E_i = \frac{\delta E_{edge}}{\delta \epsilon}$ , where  $E_{edge}$  is the energy of VBM or CBM.  $m^*$  is the effective mass in the transport direction (i.e., either along x or y direction), and  $m_a^*$  is the average effective mass given by  $\sqrt{m_x^* m_y^*}$ .

**Table S2:**  $\beta$ -PdX<sub>2</sub> monolayer: The effective mass ( $m^*$ ), the elastic modulus of the material ( $C_{2D}$ ), the deformation potential ( $E_i$ ), and the charge carrier mobilities ( $\mu_{2D}$ ).

| Material                   | Charge Type | $m^*/m_0$ | $C_{2D}$ (J/m <sup>2</sup> ) | $E_i$ (eV) | $\mu_{2D}$ (cm <sup>2</sup> V <sup>-1</sup> S <sup>-1</sup> ) |
|----------------------------|-------------|-----------|------------------------------|------------|---------------------------------------------------------------|
| $\beta$ -PdS <sub>2</sub>  | <b>h(x)</b> | 5.25      | 46.14                        | 1.565      | 25.75                                                         |
|                            | <b>e(x)</b> | 0.46      | 46.14                        | 2.55       | 1041.87                                                       |
|                            | <b>h(y)</b> | 1.72      | 26.56                        | 2.0        | 27.60                                                         |
|                            | <b>e(y)</b> | 0.22      | 26.56                        | 2.7        | 1069.15                                                       |
| $\beta$ -PdTe <sub>2</sub> | <b>h(x)</b> | 0.84      | 40.55                        | 4.34       | 107.92                                                        |
|                            | <b>e(x)</b> | 0.27      | 40.55                        | 2.0        | 1258.47                                                       |
|                            | <b>h(y)</b> | 0.32      | 8.89                         | 1.48       | 544.86                                                        |
|                            | <b>e(y)</b> | 1.56      | 8.89                         | 3.38       | 16.71                                                         |

### Thermodynamic Oxidation and Reduction Potentials of $\beta$ -PdS<sub>2</sub> monolayer in Aqueous Solution

In the light of componential analysis and the modified method mentioned in the previous literature<sup>1</sup>, we assume the  $\beta$ -PdS<sub>2</sub> monolayer can be oxidized and reduced by the photogenerated holes and electrons through the following reactions:

Reduction

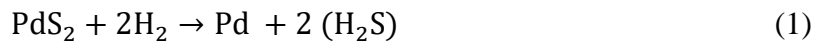

..

Oxidation

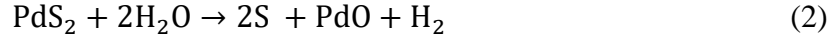

The thermodynamic reduction potential of the  $\beta$ -PdS<sub>2</sub> monolayer reduction potential ( $\phi^{re}$ ) and oxidation potential ( $\phi^{ox}$ ) could be calculated as follows

$$\phi^{re} = -[\Delta_f G^0(\text{Pd}) + 2\Delta_f G^0(\text{H}_2\text{S}) - \Delta_f G^0(\text{PdS}_2) - 2\Delta_f G^0(\text{H}_2)]/4eF + \phi(\text{H}^+/\text{H}_2) \quad (3)$$

$$\phi^{ox} = [2\Delta_f G^0(\text{S}) + \Delta_f G^0(\text{PdO}) + \Delta_f G^0(\text{H}_2) - \Delta_f G^0(\text{PdS}_2) - 2\Delta_f G^0(\text{H}_2\text{O})]/4eF + \phi(\text{H}^+/\text{H}_2) \quad (4)$$

where  $\Delta_f G^0(\text{Pd})$ ,  $\Delta_f G^0(\text{H}_2\text{S})$ ,  $\Delta_f G^0(\text{PdS}_2)$ ,  $\Delta_f G^0(\text{S})$ ,  $\Delta_f G^0(\text{PdO})$  and  $\Delta_f G^0(\text{H}_2)$  mean the standard molar Gibbs energy of formation of Pd, H<sub>2</sub>S, PdS<sub>2</sub>, S, PdO,  $\Delta_f G^0(\text{H}_2\text{O})$ , and H<sub>2</sub>. As listed in Table S3, the  $\Delta_f G^0(\text{Pd})$ ,  $\Delta_f G^0(\text{H}_2\text{S})$ ,  $\Delta_f G^0(\text{S})$ ,  $\Delta_f G^0(\text{PdO})$  and  $\Delta_f G^0(\text{H}_2)$  could be found in the handbook<sup>2</sup>. The standard molar Gibbs energy of formation of  $\beta$ -PdS<sub>2</sub> monolayer is approximated by its formation energy ( $E_f$ ), which is defined as follows:

$$E_f = E_{\text{PdS}_2} - E_{\text{Pd}} - 2E_{\text{S}}/3 \quad (5)$$

where  $E_{\text{PdS}_2}$  means the total energy of  $\beta$ -PdS<sub>2</sub> unit cell, while  $E_{\text{Pd}}$ , and  $E_{\text{S}}$  separately stand for the energy of Pd, and S in their stable phases.  $E_{\text{Pd}}$ , and  $E_{\text{S}}$  are -3442.444, and -274.251 eV/atom, respectively. The total energy of  $\beta$ -PdS<sub>2</sub> unit cell ( $E_{\text{PdS}_2}$ ) is -4002.969 eV/unit. Therefore, the formation energy of  $\beta$ -PdS<sub>2</sub> monolayer ( $E_f$ ) is -4.0 eV/aotm. ( $\text{H}^+/\text{H}_2$ ) is 0 V relative to the normal hydrogen electrode (NHE) potential. F and e represent the Faraday constant and the elemental charge, respectively. After plugging the relevant values into Equation 3-4,  $\phi^{re}$ ,  $\phi^{ox}$  is obtained as -1.707 V and 3.07 V (relative to NHE). The  $\phi^{re}$  is smaller than 0 V, while the  $\phi^{ox}$  is larger than 1.23 V, indicating the strong resistance to photoinduced corrosion of  $\beta$ -PdS<sub>2</sub> monolayer.

**Table S3** Standard Molar Gibbs Energy of Formation ( $\Delta_f G^0$ ) at 298.15 K in kJ/mol.

| Molecular Formula     | $\Delta_f G^0$ | Molecular Formula     | $\Delta_f G^0$ |
|-----------------------|----------------|-----------------------|----------------|
| <b>Pd</b>             | 339.7          | <b>H<sub>2</sub>O</b> | -237.1         |
| <b>H<sub>2</sub>S</b> | -33.4          | <b>S</b>              | 236.7          |
| <b>H<sub>2</sub></b>  | 0              | <b>PdO</b>            | 325.9          |

### Adsorption/Intercalation Energies

**Table S4.** Binding energies of adsorption, intercalation and adspt+intclt models for (001) surface of  $\beta$ -PdS<sub>2</sub>.

| H <sub>2</sub> O Molecules | Binding Energy per H <sub>2</sub> O Molecules (eV) |               |              |
|----------------------------|----------------------------------------------------|---------------|--------------|
|                            | Adsorption                                         | Intercalation | Adspt+Intclt |
| <b>1</b>                   | -0.059                                             | -0.047        | -            |
| <b>2</b>                   | -0.34                                              | -0.35         | -            |
| <b>3</b>                   | -0.82                                              | -0.81         | -            |
| <b>4</b>                   | -1.40                                              | -1.43         | -            |
| <b>8</b>                   | -                                                  | -             | -2.82        |

..

## Gibbs Free energy Calculations

To further clarify the thermodynamics of water redox reactions on the  $\beta$ -PdS<sub>2</sub>, we calculate the Gibbs free energy change of HER and OER at pH 0 to 7, with and without the effect of light irradiation. The hydrogen electrode model developed by Nørskov et al. is adopted to calculate the Gibbs free energy, as follows:

$$\Delta G = \Delta E + \Delta E_{ZPE} - T\Delta S + \Delta G_U + \Delta G_{pH} \quad (6)$$

where  $\Delta E$  represents the DFT computed total energy difference, and  $\Delta E_{ZPE}$  and  $T\Delta S$  are the zero-point energy difference and the entropy, respectively.  $\Delta G_U$  ( $\Delta G_U = -eU$ ) denotes the extra potential bias provided by an electron in the electrode, where  $U$  is the electrode potential relative to the standard hydrogen electrode (SHE).  $\Delta G_{pH}$  represents the contribution of Gibbs free energy at different pH concentrations.

The HER half-reaction can be decomposed into a two-electron step, and the reaction equation can be written as:

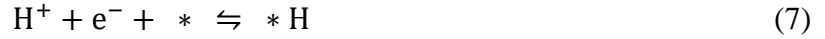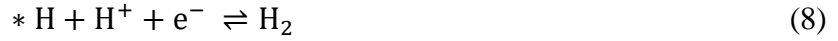

The OER half-reaction can be decomposed into a four-electron step, and the reaction equation can be written as:

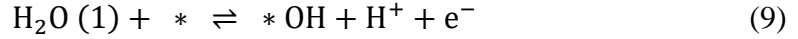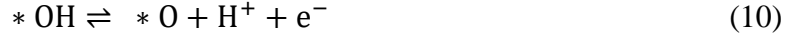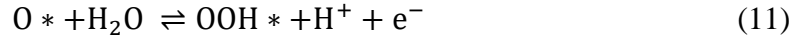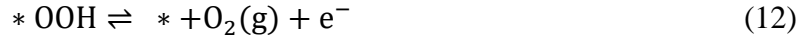

Gibbs free energy changes  $\Delta G$  for each intermediate and each step in the OER process were calculated using the following equations

$$\Delta G_{OH} = G(*OH) + G(H^+ + e^-) - G(*) - G(H_2O)$$

$$\Delta G_O = G(*O) + 2G(H^+ + e^-) - G(*) - G(H_2O)$$

$$\Delta G_{OOH} = G(*OOH) + 3G(H^+ + e^-) - G(*) - 2G(H_2O)$$

Then, considering the effect of electrode potential ( $U$ ) and pH, the free energy change for OER electrochemical steps can be expressed as:

$$\Delta G_1 = \Delta G_{OH} = \Delta G_{OH} = G(*OH) + G(H^+ + e^-) - G(*) - G(H_2O) - \Delta G_U - \Delta G_{pH}$$

$$\Delta G_2 = \Delta G_O - \Delta G_{OH} = G(*O) + G(H^+ + e^-) - G(*OH) - \Delta G_U - \Delta G_{pH}$$

$$\Delta G_3 = \Delta G_{OOH} - \Delta G_O = G(*OOH) + G(H^+ + e^-) - G(*O) - G(H_2O) - \Delta G_U - \Delta G_{pH}$$

$$\Delta G_4 = 4.92 [eV] + [G(*) + 2G(H_2O)] - [G(*OOH) + 3G(H^+ + e^-)] - [\Delta G_U + \Delta G_{pH}]$$

**Table S5.** Zero-point energy correction ( $E_{ZPE}$ ), entropy contribution ( $TS$ ,  $T=298.15K$ ), total energy ( $E$ ), and the Gibbs free energy ( $G$ ) of molecules and adsorbents on  $\beta$ -PdS<sub>2</sub> monolayer.

| Adsorbents       | $E_{ZPE}$ (eV) | $-TS$ (eV) | $E$ (eV)        | $G$ (eV)      |
|------------------|----------------|------------|-----------------|---------------|
| H <sub>2</sub>   | 0.31           | -0.41      | -31.7593720     | -31.8593720   |
| H <sub>2</sub> O | 0.62           | -0.67      | -467.3122953    | -467.362295   |
| *                | -              | -          | -16018.508215   | -16018.508215 |
| *O               | 0.09           | -0.00      | -16452.228387   | -16452.138387 |
| *OH              | 0.36           | -0.00      | -16468.11140343 | -16467.751403 |
| *OOH             | 0.46           | -0.21      | -16900.195346   | -16899.945346 |
| *H               | 0.23           | -0.00      | -16033.713824   | -16033.483824 |

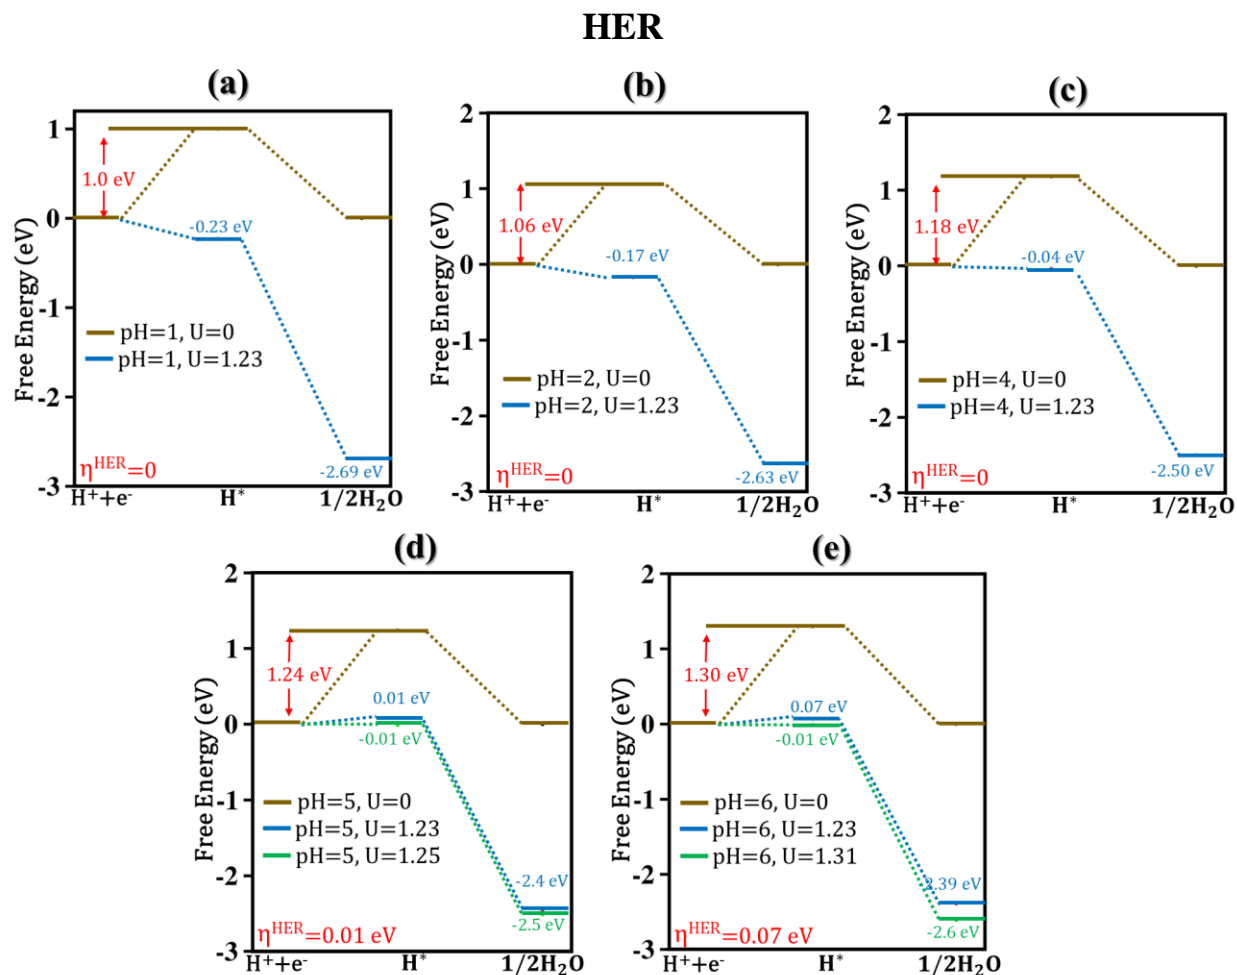

**Fig. S5** Free energy profile on  $\beta$ -PdS<sub>2</sub> monolayer for HER at (a) pH=1 (b) pH = 2 (c) pH=4 (d) pH=5 (e) pH=6.

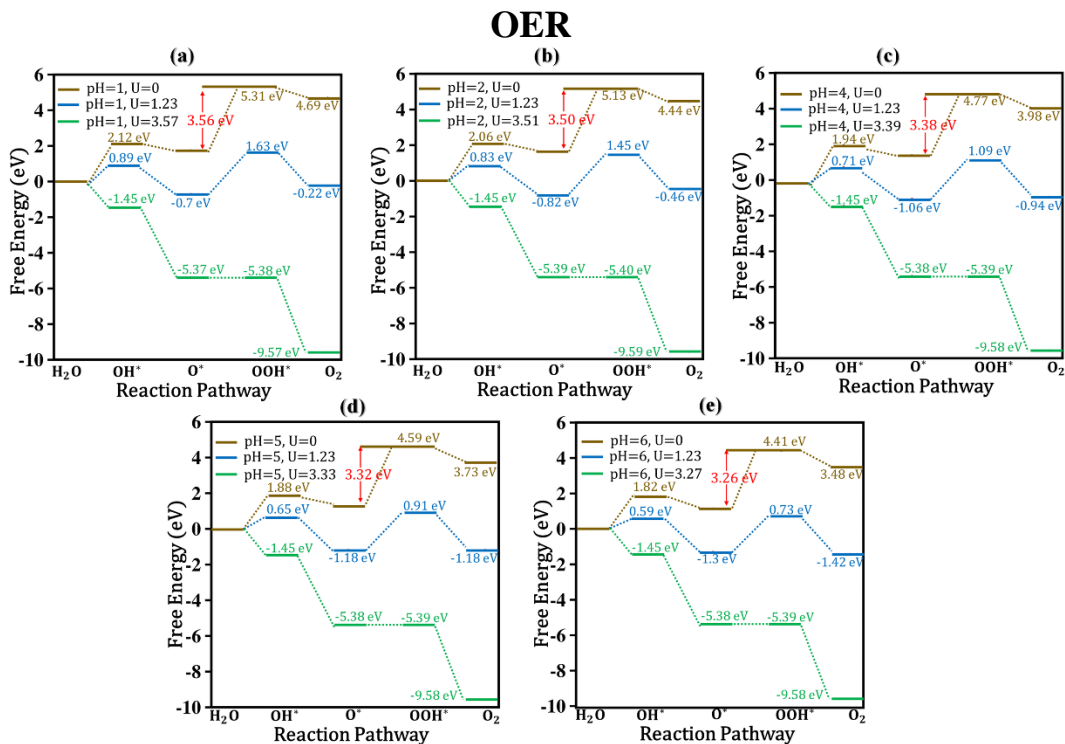

**Fig. S6** Free energy profile on  $\beta$ -PdS<sub>2</sub> monolayer for OER at (a) pH=1 (b) pH = 2 (c) pH=4 (d) pH=5 (e) pH=6.

### Solar to Hydrogen Efficiency

**Table S6.** Calculated the Over-Potential for HER  $\chi(\text{H}_2)$  and OER  $\chi(\text{O}_2)$ ,  $E$  is the energy of photons of  $\beta$ -PdS<sub>2</sub> monolayer with the function of pH. The energy conversion efficiency of light absorption ( $\eta_{\text{abs}}$ ), carrier utilization ( $\eta_{\text{cu}}$ ), and STH ( $\eta_{\text{STH}}$ ).

| pH | $\chi(\text{H}_2)$ (eV) | $\chi(\text{O}_2)$ (eV) | $E$ (eV) | $\eta_{\text{abs}}$ (%) | $\eta_{\text{cu}}$ (%) | $\eta_{\text{STH}}$ (%) |
|----|-------------------------|-------------------------|----------|-------------------------|------------------------|-------------------------|
| 0  | 0.45                    | 0.42                    | 2.28     | 32.35                   | 35.28                  | 11.41                   |
| 1  | 0.39                    | 0.48                    | 2.22     | 32.35                   | 39.17                  | 12.67                   |
| 2  | 0.33                    | 0.54                    | 2.16     | 32.35                   | 43.08                  | 13.93                   |
| 3  | 0.27                    | 0.6                     | 2.10     | 32.35                   | 47.58                  | 15.39                   |
| 4  | 0.21                    | 0.65                    | 2.10     | 32.35                   | 47.58                  | 15.39                   |
| 5  | 0.16                    | 0.715                   | 2.14     | 32.35                   | 44.39                  | 14.36                   |
| 6  | 0.098                   | 0.774                   | 2.20     | 32.35                   | 40.47                  | 13.09                   |
| 7  | 0.039                   | 0.833                   | 2.26     | 32.35                   | 36.57                  | 11.83                   |

The STH efficiency is considered under the situation of 100% efficiency of the catalytic reaction.<sup>2</sup>  
<sup>3</sup>  $\eta_{\text{STH}}$  is estimated by  $\eta_{\text{STH}} = \eta_{\text{abs}} \times \eta_{\text{cu}}$  where  $\eta_{\text{abs}}$  is the efficiency of light absorption and  $\eta_{\text{cu}}$  is carrier utilization. The efficiency of light absorption ( $\eta_{\text{abs}}$ ) is defined as



..

$$\eta_{\text{abs}} = \frac{\int_{E_g}^{\infty} P(\hbar\omega)d(\hbar\omega)}{\int_0^{\infty} P(\hbar\omega)d(\hbar\omega)}$$

where  $P(\hbar\omega)$  is the AM1.5G solar energy flux at the photon energy  $\hbar\omega$  and  $E_g$  is the band gap of semiconductors.

The efficiency of carrier utilization as ( $\eta_{\text{cu}}$ ) is defined as

$$\eta_{\text{cu}} = \frac{\Delta G \int_E^{\infty} \frac{P(\hbar\omega)}{\hbar\omega} d(\hbar\omega)}{\int_{E_g}^{\infty} P(\hbar\omega)d(\hbar\omega)}$$

Where  $\Delta G$  is the potential difference for water splitting (1.23 eV) and  $E$  is the energy of photons used for water splitting.  $E$  is determined by

$$E = \begin{cases} E_g, (\chi(\text{H}_2) \geq 0.2, \chi(\text{O}_2) \geq 0.6) \\ E_g + 0.2 - c, (\chi(\text{H}_2) < 0.2, \chi(\text{O}_2) \geq 0.6) \\ E_g + 0.6 - \chi(\text{O}_2), (\chi(\text{H}_2) \geq 0.2, \chi(\text{O}_2) < 0.6) \\ E_g + 0.8 - \chi(\text{H}_2) - \chi(\text{O}_2), (\chi(\text{H}_2) < 0.2, \chi(\text{O}_2) < 0.6) \end{cases}$$

where  $\chi(\text{H}_2)$  is overpotential for HER, and  $\chi(\text{O}_2)$  is overpotential for oxygen evolution reaction (OER). Considering the previous experiments and theoretical calculations reports, the required overpotentials for HER and OER are assumed to be 0.2 and 0.6 eV, respectively<sup>4,5</sup>.

### Excitonic Solar Cell

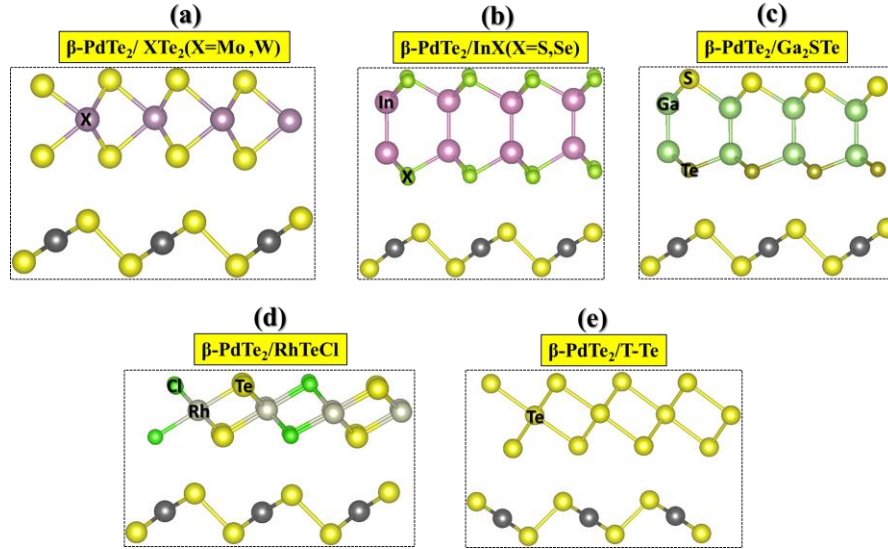

**Fig. S7** Atomic configurations of (a)  $\beta\text{-PdTe}_2/\text{XTe}_2$  ( $\text{X}=\text{Mo}, \text{W}$ ) (b)  $\beta\text{-PdTe}_2/\text{InX}$  ( $\text{X}=\text{S}, \text{Se}$ ) (c)  $\beta\text{-PdTe}_2/\text{Ga}_2\text{STe}$  (d)  $\beta\text{-PdTe}_2/\text{RhTeCl}$  and (e)  $\beta\text{-PdTe}_2/\text{T-Te}$  heterostructures.

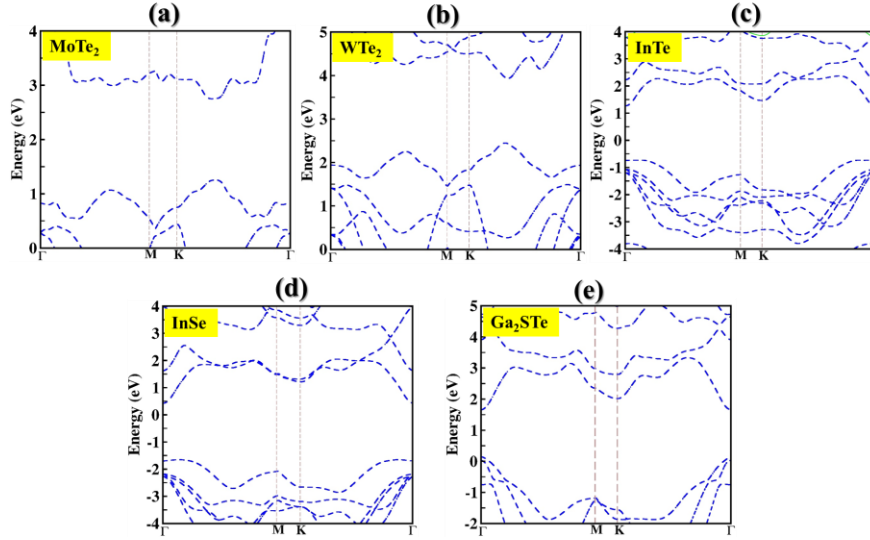

**Fig. S8** The calculated band structure of monolayer (a) MoTe<sub>2</sub> (b) WTe<sub>2</sub> (c) InTe (d) InSe (e) Ga<sub>2</sub>STe using HSE06 functional.

**Table S7:** Calculated lattice parameters, and bandgap ( $E_g$ ) values for optimized TMDs monolayers and lattice mismatch, interlayer distance ( $d$ ) and binding energy  $E_b$  of  $\beta$ -PdTe<sub>2</sub> with TMDs heterostructure.

| TMDs                      | Lattice Parameters          |                             | $E_g$ (eV)                  | CBM                           | VBM                           | Lattice Mismatch (%) | $d$ (Å) | $E_b$ (meV/atom) |
|---------------------------|-----------------------------|-----------------------------|-----------------------------|-------------------------------|-------------------------------|----------------------|---------|------------------|
|                           | $a$ (Å)                     | $b$ (Å)                     |                             |                               |                               |                      |         |                  |
| MoTe <sub>2</sub>         | 3.55<br>(3.54) <sup>6</sup> | 6.16<br>(6.14) <sup>6</sup> | 1.51<br>(1.50) <sup>6</sup> | -3.86                         | -5.37                         | 5.44                 | 2.73    | 330              |
| WTe <sub>2</sub>          | 3.56<br>(3.55) <sup>6</sup> | 6.16<br>(6.15) <sup>6</sup> | 1.49<br>(1.47) <sup>6</sup> | -3.75                         | -5.24                         | 5.58                 | 2.71    | 370              |
| Ga <sub>2</sub> STe       | 3.85<br>(3.89) <sup>7</sup> | 6.72                        | 1.51<br>(1.61) <sup>7</sup> | -4.25<br>(-4.29) <sup>7</sup> | -5.76<br>(-5.90) <sup>7</sup> | 2.25                 | 3.01    | 58               |
| InSe                      | 4.08<br>(4.08) <sup>7</sup> | 7.07                        | 2.10<br>(2.19) <sup>7</sup> | -4.37<br>(-4.27) <sup>7</sup> | -6.55<br>(-6.46) <sup>7</sup> | 3.88                 | 3.14    | 9                |
| InTe                      | 4.38<br>(4.38) <sup>7</sup> | 7.58                        | 2.00<br>(2.01) <sup>7</sup> | -4.05                         | -6.05                         | 4.89                 | 2.97    | 20               |
| RhTeCl                    | 3.70<br>(3.67) <sup>8</sup> | 6.72<br>(6.65) <sup>8</sup> | 2.23<br>(2.49) <sup>8</sup> | -4.27<br>(-4.01) <sup>8</sup> | -6.50<br>(-6.50) <sup>8</sup> | 4.15                 | 2.76    | 60               |
| T-Te                      | 4.25<br>(4.23) <sup>9</sup> | 7.36                        | 1.01<br>(1.11) <sup>9</sup> | -4.26                         | -5.27                         | 3.96                 | 2.89    | 9                |
| $\beta$ -PdS <sub>2</sub> | 3.49                        | 4.32                        | 2.10                        | -3.98                         | -6.09                         | 12.0                 | 2.60    | 53               |

..

**Table S8.** The conduction band offsets ( $\Delta E_c$ ), and percentage PCEs of the heterostructure of the monolayer of  $\beta$ -PdTe<sub>2</sub> with different TMDs

| System                                                 | $\Delta E_c$ (eV) | PCE%  |
|--------------------------------------------------------|-------------------|-------|
| $\beta$ -PdTe <sub>2</sub> / MoTe <sub>2</sub>         | 0.11              | 20.59 |
| $\beta$ -PdTe <sub>2</sub> / WTe <sub>2</sub>          | 0.001             | 23.14 |
| $\beta$ -PdTe <sub>2</sub> /Ga <sub>2</sub> STe        | 0.50              | 11.47 |
| $\beta$ -PdTe <sub>2</sub> /InSe                       | 0.63              | 8.42  |
| $\beta$ -PdTe <sub>2</sub> /InTe                       | 0.31              | 15.92 |
| $\beta$ -PdTe <sub>2</sub> /RhTeCl                     | 0.52              | 10.99 |
| $\beta$ -PdTe <sub>2</sub> /T-Te                       | 0.52              | 10.99 |
| $\beta$ -PdTe <sub>2</sub> / $\beta$ -PdS <sub>2</sub> | 0.23              | 17.79 |

### References

1. S. Chen and L.-W. Wang, *Chemistry of Materials*, 2012, **24**, 3659-3666.
2. Z. Chen, T. F. Jaramillo, T. G. Deutsch, A. Kleiman-Shwarscstein, A. J. Forman, N. Gaillard, R. Garland, K. Takanabe, C. Heske and M. Sunkara, *Journal of Materials Research*, 2010, **25**, 3.
3. C.-F. Fu, J. Sun, Q. Luo, X. Li, W. Hu and J. Yang, *Nano letters*, 2018, **18**, 6312-6317.
4. C. C. McCrory, S. Jung, J. C. Peters and T. F. Jaramillo, *Journal of the American Chemical Society*, 2013, **135**, 16977-16987.
5. Y. Zheng, Y. Jiao, M. Jaroniec and S. Z. Qiao, *Angewandte Chemie International Edition*, 2015, **54**, 52-65.
6. H. Huang, X. Fan, D. J. Singh, H. Chen, Q. Jiang and W. Zheng, *Physical Chemistry Chemical Physics*, 2016, **18**, 4086-4094.
7. A. Huang, W. Shi and Z. Wang, *The Journal of Physical Chemistry C*, 2019, **123**, 11388-11396.
8. H. Yang, Y. Ma, Y. Liang, B. Huang and Y. Dai, *ACS applied materials & interfaces*, 2019, **11**, 37901-37907.
9. J. Singh, P. Jamdagni, M. Jakhar and A. Kumar, *Physical Chemistry Chemical Physics*, 2020, **22**, 5749-5755.
